# Supplementary material for: Identification and characterization of CYPs induced in the Drosophila antenna by exposure to a plant odorant
Source: PubMed Central journal article supplement (PMC8521596; doi:10.1038/s41598-021-99910-9), 2021-10-15
Supplement: 41598_2021_99910_MOESM1_ESM.pdf [file 41598_2021_99910_MOESM1_ESM.pdf]

## **Supplementary Information**

### **Identification and characterization of CYPs induced in the *Drosophila* antenna by exposure to a plant odorant**

Shane R. Baldwin, Pratyajit Mohapatra, Monica Nagalla, Rhea Sindvani, Desiree Amaya, Hope  
A. Dickson, and Karen Menuz

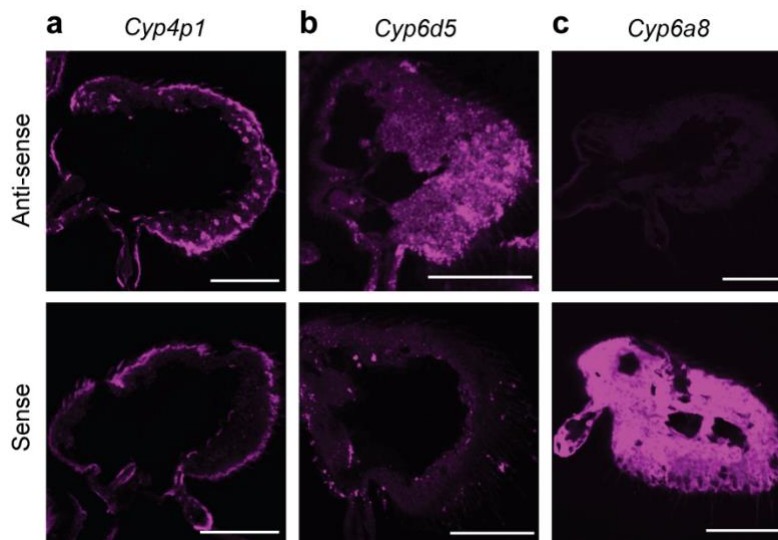

**Supplementary Figure 1.** FISH can be used to localize *Cyp4p1* and *Cyp6d5*, but not *Cyp6a8*.

(a) Antennal sections from wild-type flies exposed to 5% geranyl acetate for two hours show cellular labeling with an anti-sense *Cyp4p1* FISH probe, but not a sense control probe. Non-specific cuticular labeling on the edge of the antenna is also observed. (b) Similar to (a), but for *Cyp6d5*. (c) A *Cyp6a8* anti-sense FISH probe does not label antennal sections from wild-type flies exposed to geranyl acetate, but non-specific staining is seen in sense probe controls. Scale bars are 50  $\mu\text{m}$  in each image.

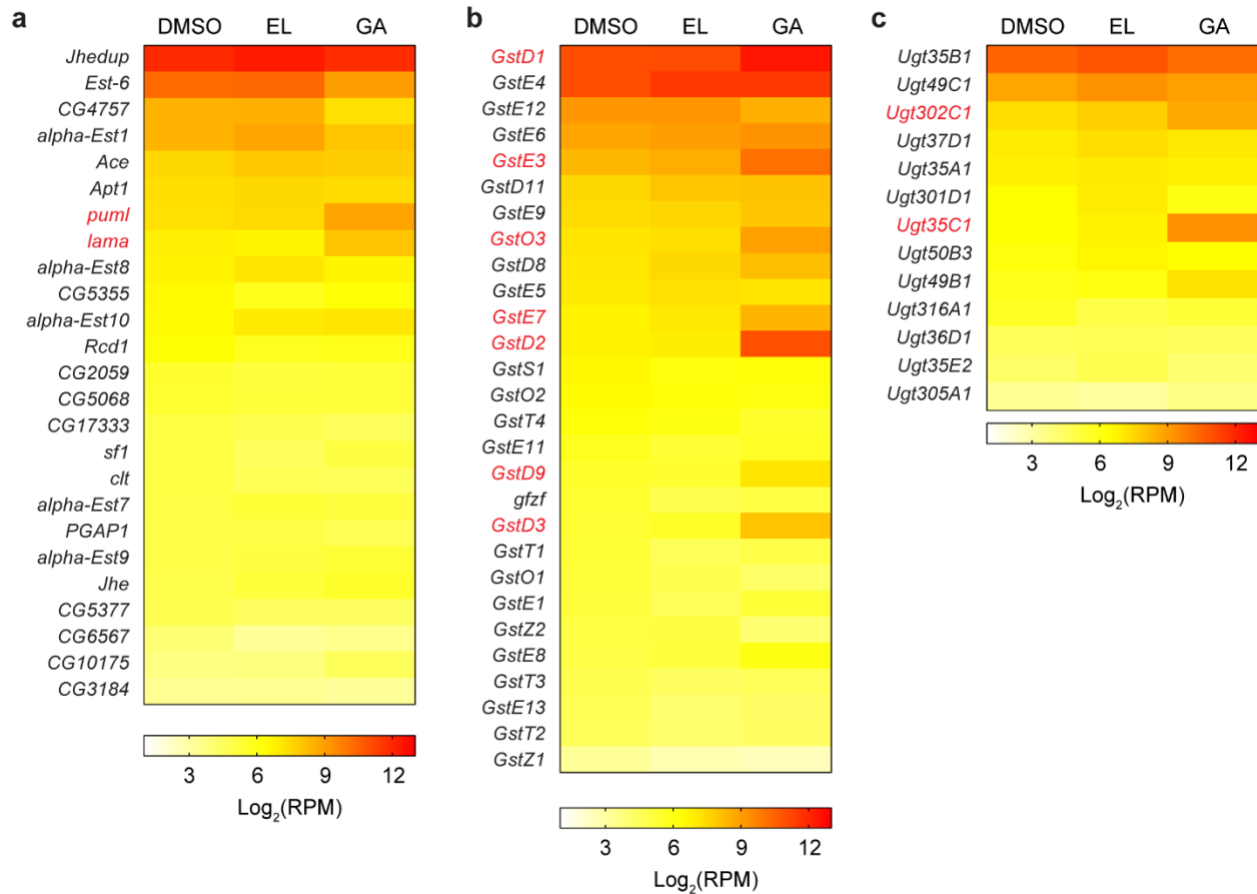

**Supplementary Figure 2.** Expression of other ODEs following odorant exposure. **(a)** A heat map showing the average expression in log<sub>2</sub>(RPM) of each of the antennal-expressed carboxylesterase genes in each odorant exposure condition (n=3). **(b)** Similar to **(a)**, but for GSTs. **(c)** Similar to **(a)**, but for UGTs. In each panel, GA-induced genes are in red font.
